# Supplementary material for: Characterization of Microbial Communities in Wastewater Treatment Plants Containing Heavy Metals Located in Chemical Industrial Zones
Source: MDPI journal article supplement (doi:10.3390/ijerph19116529), 2022-05-27
Supplement: s1 [file s1]

**Figure S1** Process flow of the wastewater treatment plants

**Table S1.** Composition and concentrations of wastewater samples in the tested wastewater treatment plants (unit: mg/L).

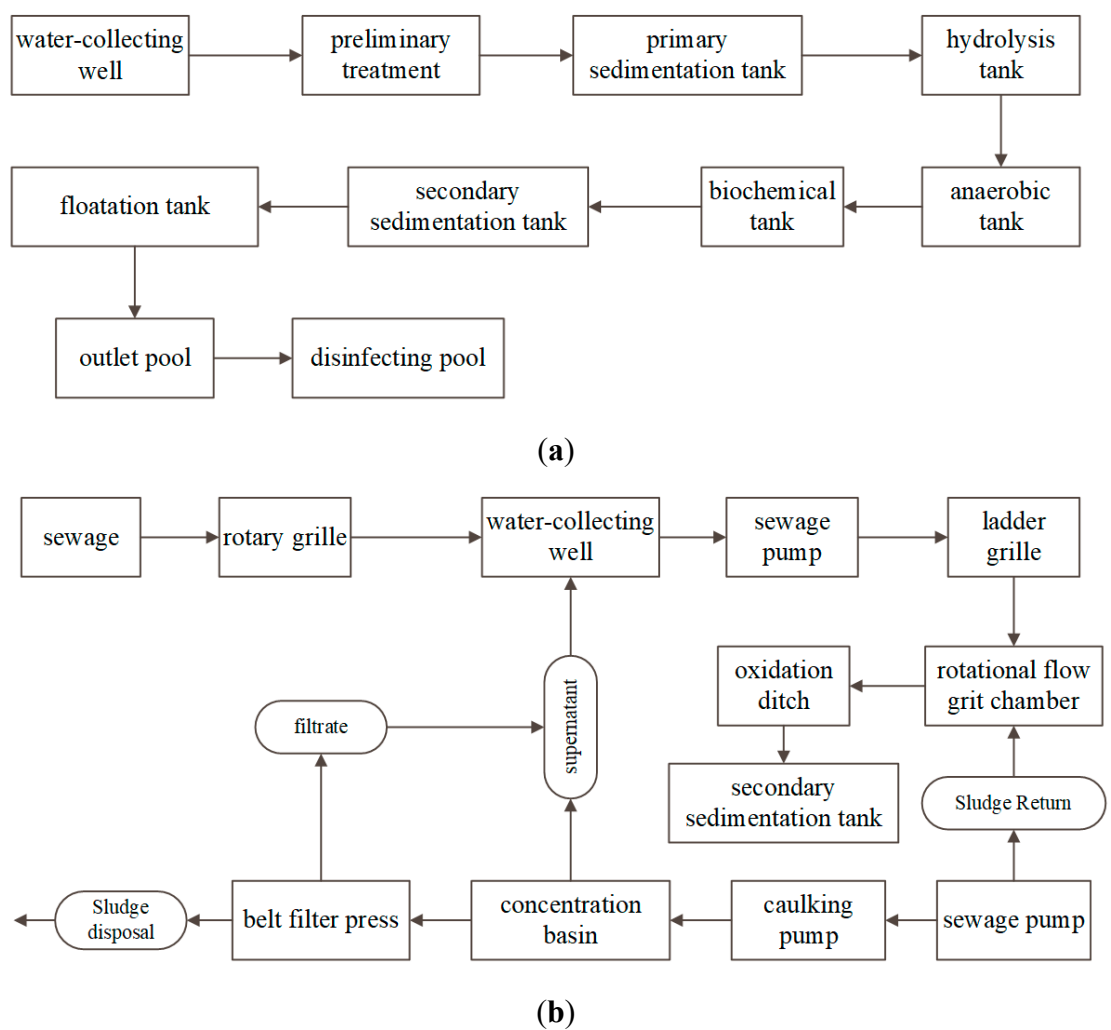

**Figure. S1** Process flow of the wastewater treatment plants. (a) SM-WWTP process flow; (b) XW-WWTP process flow.

**Table S1.** Composition and concentrations of wastewater samples in the tested wastewater treatment plants (unit: mg/L).

| <b>samples</b> | <b>pH</b> | <b>NH<sub>4</sub><sup>+</sup>-N</b> | <b>TN</b> | <b>Mn</b> | <b>Fe</b> | <b>Ni</b> | <b>Cu</b> | <b>Zn</b> | <b>Cd</b> | <b>Pb</b> |
|----------------|-----------|-------------------------------------|-----------|-----------|-----------|-----------|-----------|-----------|-----------|-----------|
| SM_A           | 7.04      | 2.571                               | 4.875     | 1.226     | 0.020     | 0.023     | 0.012     | 0.371     | 0.008     | 0.003     |
| SM_O           | 6.68      | 5.474                               | 9.561     | 1.798     | 0.097     | 0.021     | 0.021     | 0.231     | 0.004     | 0.002     |
| XW_A           | 7.22      | 4.593                               | 6.394     | 0.018     | 0.368     | 0.003     | 0.026     | 0.095     | 0.000     | 0.024     |
| XW_M           | 7.12      | 5.163                               | 6.210     | 0.027     | 1.827     | 0.004     | 0.030     | 0.159     | 0.000     | 0.075     |
| XW_O           | 7.03      | 4.956                               | 6.813     | 0.025     | 1.548     | 0.003     | 0.021     | 0.144     | 0.000     | 0.074     |

SM: SM-WTTP; XW: XW-WTTP; A: Anaerobic tank; O: Aerobic tank;

M: membrane bioreactor
